# Supplementary material for: Providing Insights into the Markets for Bio-Based Materials with BioMAT
Source: MDPI journal article supplement (doi:10.3390/su15043064), 2023-02-08
Supplement: s1 [file s1]

Archive with 1 entries (1 files):
- sustainability-2149639-supplementary-final.pdf
